# Supplementary material for: Nitrogen doped graphene quantum dots as a cocatalyst of SrTiO3(Al)/CoOx for photocatalytic overall water splitting
Source: Royal Society of Chemistry journal article supplement (doi:10.1039/d1cy00388g), 2021-01-01
Supplement: d1cy00388g1.pdf [file d1cy00388g1.pdf]

## Nitrogen doped graphene quantum dots as cocatalyst of SrTiO<sub>3</sub>(Al)/CoO<sub>x</sub> for photocatalytic overall water splitting

Yuxiang Liu,<sup>a,b</sup> Xuejun Xu,<sup>c</sup> Shangchun Lv,<sup>b</sup> Hewen Li<sup>d</sup>, Zhichun Si,<sup>b,\*</sup> Xiaodong Wu,<sup>a</sup> Rui Ran,<sup>a</sup>  
Duan Weng<sup>a,b,\*</sup>

<sup>a</sup> The Key Laboratory of Advanced Materials of Ministry of Education, School of Materials Science and Engineering, Tsinghua University, Beijing City, 100084, China

<sup>b</sup> International Graduate School at Shenzhen, Tsinghua University, Shenzhen City, 518055, China

<sup>c</sup> College of Materials Science and Energy Engineering, Foshan University, Foshan City, 528000, China

<sup>d</sup> Wenzheng College, Soochow University, Suzhou City, 215104, China

\* Corresponding Author: [si.zhichun@sz.tsinghua.edu.cn](mailto:si.zhichun@sz.tsinghua.edu.cn); [duanweng@mails.tsinghua.edu.cn](mailto:duanweng@mails.tsinghua.edu.cn)

### Results

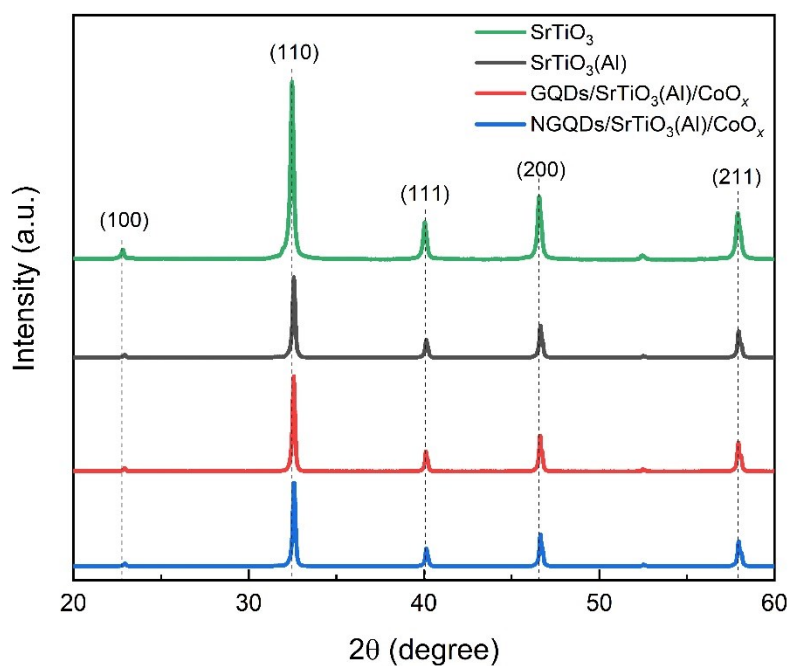

Fig. S1 XRD patterns of pristine SrTiO<sub>3</sub>, SrTiO<sub>3</sub>(Al), GQDs/SrTiO<sub>3</sub>(Al) and NGQDs/SrTiO<sub>3</sub>(Al)

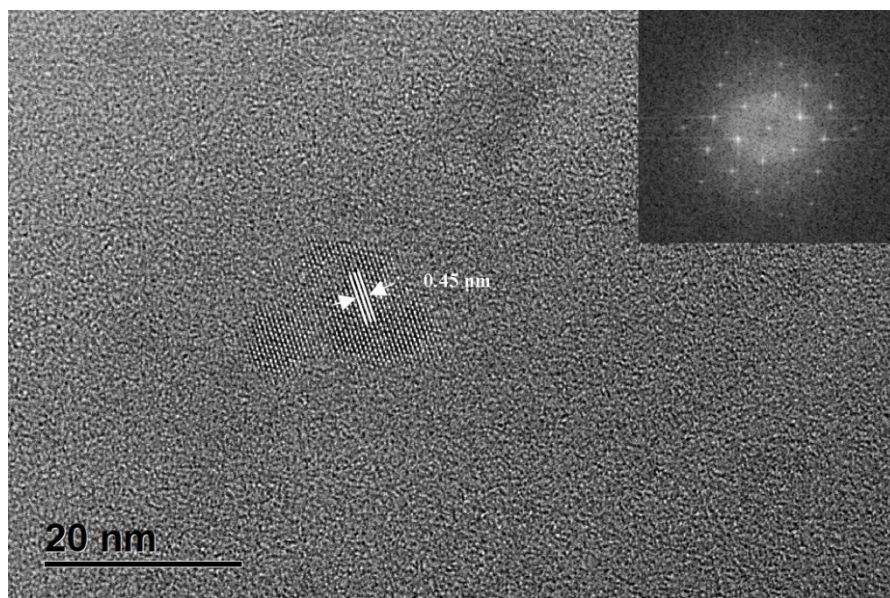

Fig. S2 HRTEM image of NGQDs, and the FFT pattern shown in the inset image

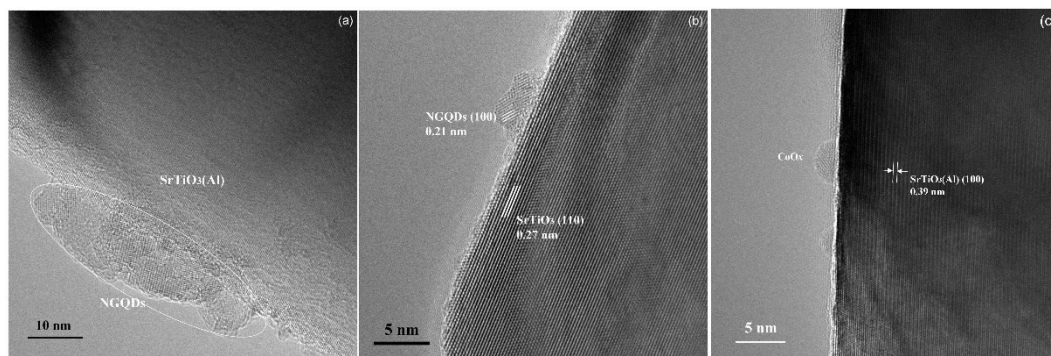

Fig. S3 HRTEM images of NGQDs/SrTiO<sub>3</sub>(Al) (a), (b) and HRTEM image of SrTiO<sub>3</sub>(Al)/CoO<sub>x</sub> (c)

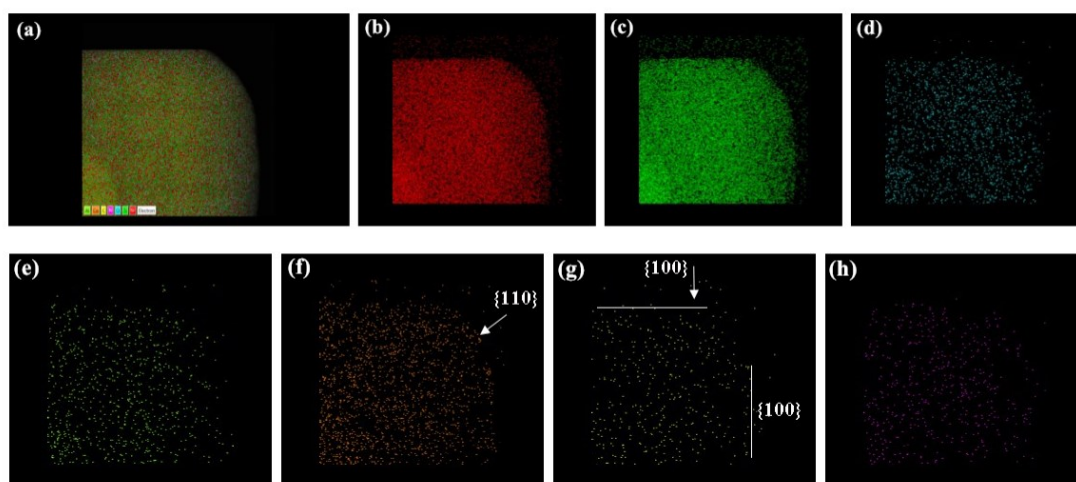

Fig. S4 STEM-mapping patterns of all elements (a), Sr (b), Ti (c), O (d), Al (e), Co (f), C (g), and N (h) of NGQDs/SrTiO<sub>3</sub>(Al)/CoO<sub>x</sub>

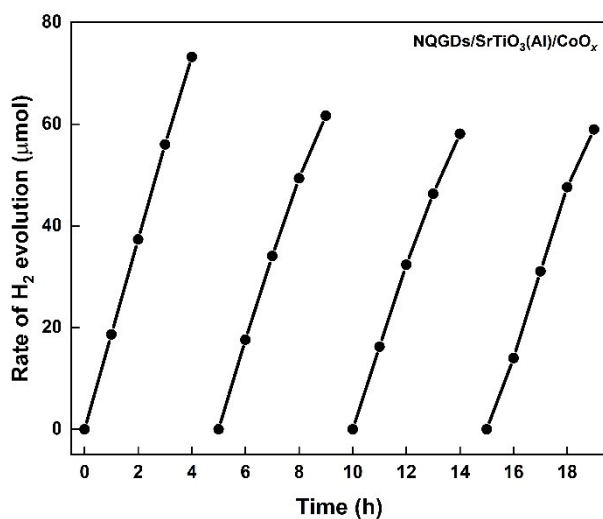

Fig. S5 Stability plots of NGQDs/SrTiO<sub>3</sub>(Al)/CoO<sub>x</sub> photocatalyst

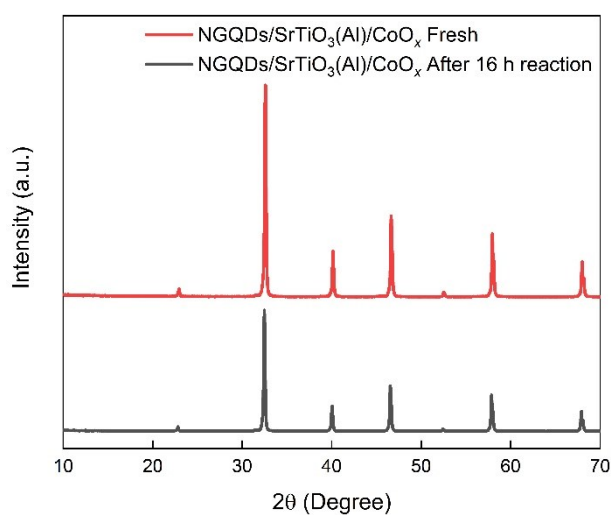

Fig. S6 XRD patterns of fresh and reacted NGQDs/SrTiO<sub>3</sub>(Al)/CoO<sub>x</sub>

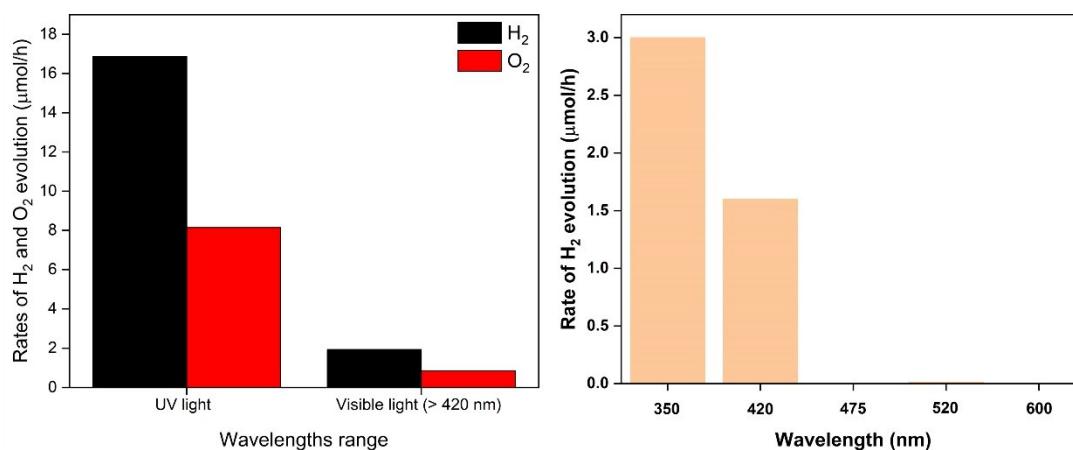

Fig. S7 The photocatalytic overall water splitting activities of NGQDs/SrTiO<sub>3</sub>(Al)/CoO<sub>x</sub> under UV light and visible light (> 420 nm) (a) and the H<sub>2</sub> evolution rates of NGQDs/SrTiO<sub>3</sub>(Al)/CoO<sub>x</sub> photocatalyst for overall water

splitting under different central wavelengths irradiation (b)

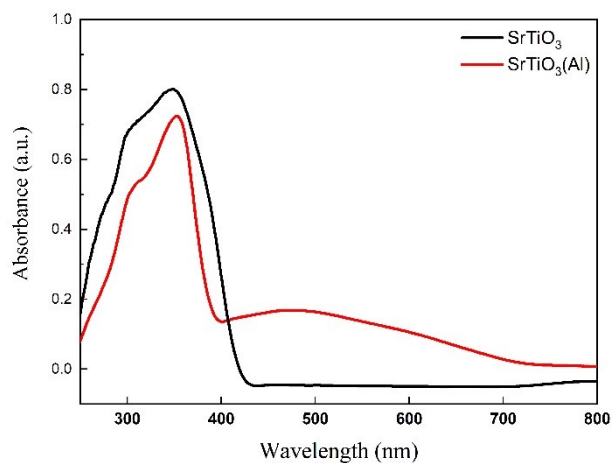Fig. S8 UV-vis DRS spectra of pristine SrTiO<sub>3</sub> and SrTiO<sub>3</sub>(Al)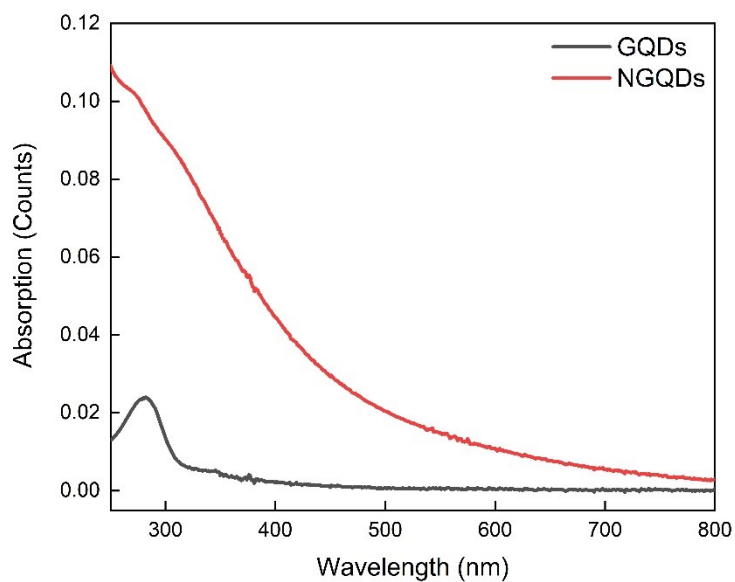

Fig. S9 UV-vis spectra of pristine GQDs and NGQDs

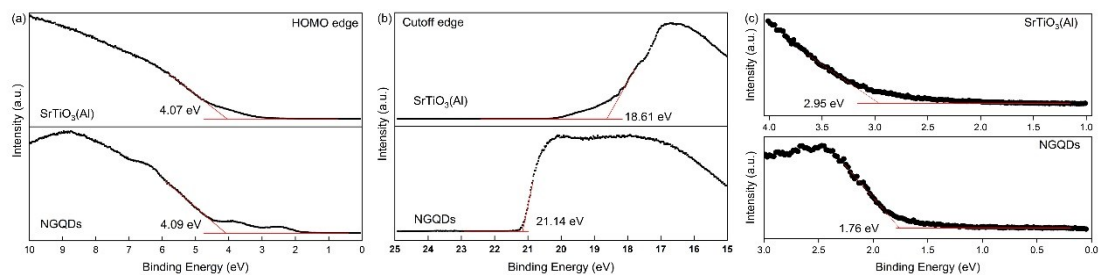Fig. S10 HOMO edges (a), cutoff edges (b) and the energy difference between  $E_{VBM}$  and the Fermi level (c) ofSrTiO<sub>3</sub>(Al) and NGQDs in UPS spectra

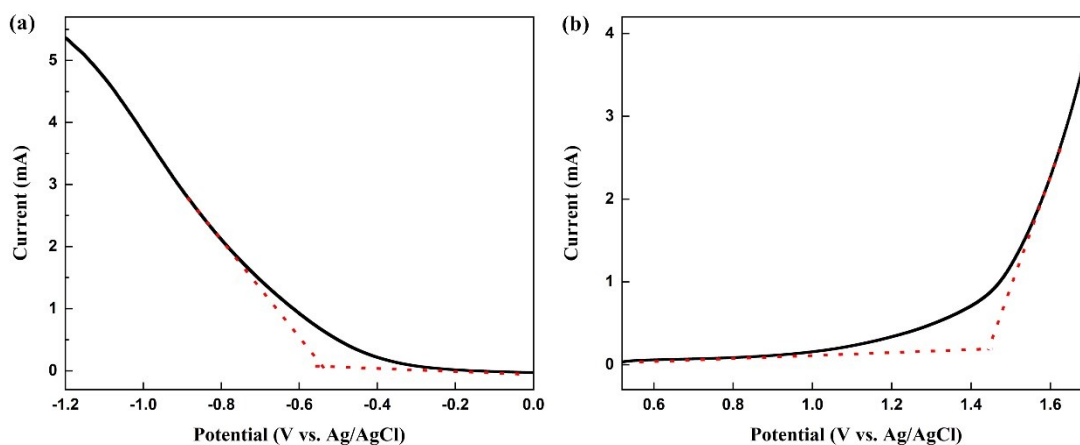Fig. S11 LSV plots of NGQDs with slow scan rate  $5 \text{ mV s}^{-1}$ 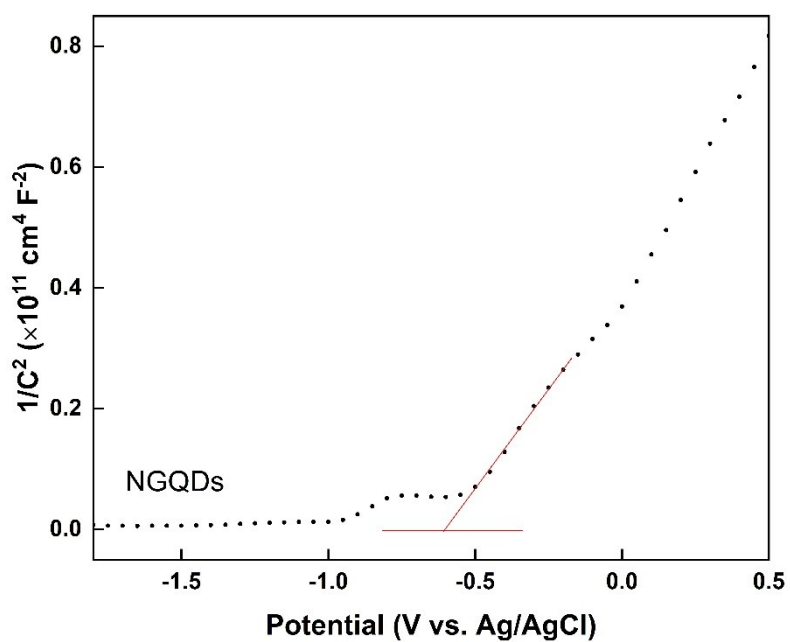

Fig. S12 Mott-Schottky plot of NGQDs

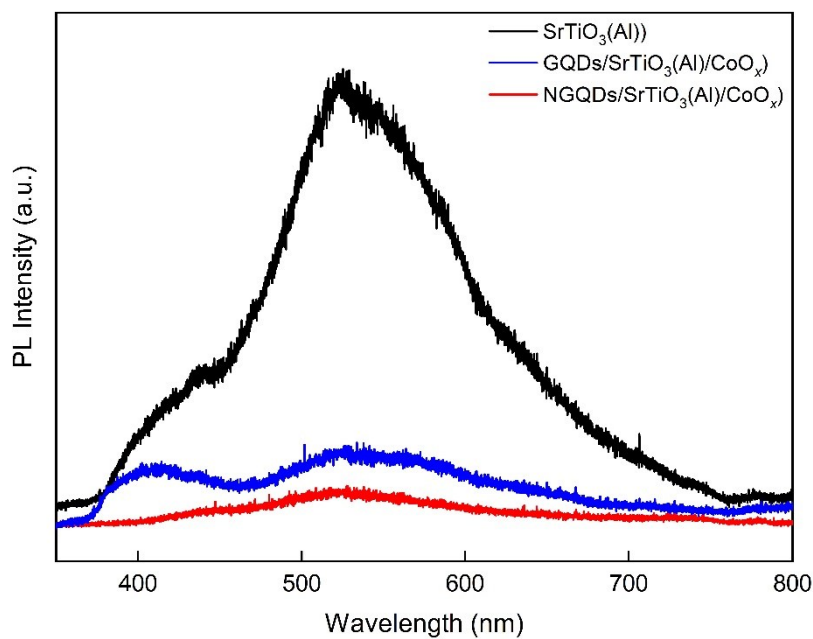

Fig. S13 PL plots of SrTiO<sub>3</sub>(Al), GQDs/SrTiO<sub>3</sub>(Al)/CoO<sub>x</sub>, and NGQDs/SrTiO<sub>3</sub>(Al)/CoO<sub>x</sub>.

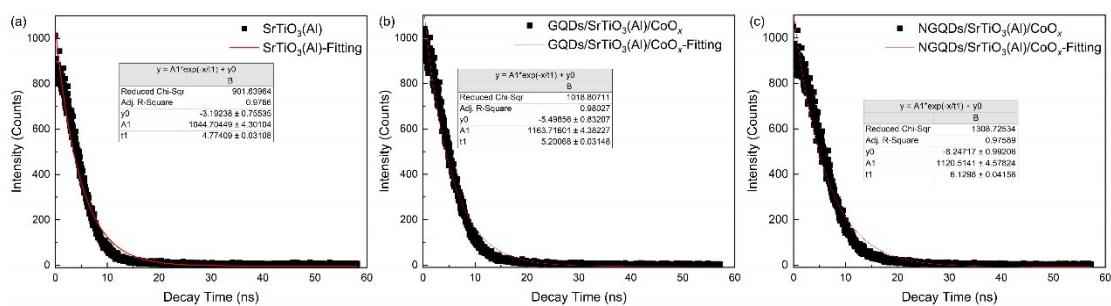

Fig. S14 Fluorescence decay of SrTiO<sub>3</sub>(Al) (a), GQDs/SrTiO<sub>3</sub>(Al)/CoO<sub>x</sub> (b) and NGQDs/SrTiO<sub>3</sub>(Al)/CoO<sub>x</sub> (c) by single exponential function fitting
